# Supplementary material for: A dozen predicted SiGe alloys with low enthalpies and strong absorption of sunlight for photovoltaic applications
Source: Royal Society of Chemistry journal article supplement (doi:10.1039/d4cp03927k), 2025-01-01
Supplement: d4cp03927k1.pdf [file d4cp03927k1.pdf]

## **Dozen predicated SiGe alloys with low enthalpies and strong absorption to sunlight for photovoltaic applications**

Zehao Lin, <sup>a</sup> Qingyang Fan, <sup>b</sup> Qing Pang, <sup>a</sup> Jin Zhong Zhang, <sup>c</sup> Dangli Gao, <sup>\*a</sup> Yuling Song, <sup>d</sup>

<sup>a</sup> College of Science, Xi'an University of Architecture and Technology, Xi'an 710055, People's Republic of China

<sup>b</sup> College of Information and Control Engineering, Xi'an University of Architecture and Technology, Xi'an 710055, People's Republic of China

<sup>c</sup> Department of Chemistry and Biochemistry, University of California, Santa Cruz, California 95064, USA

<sup>d</sup> College of Physics and Electronic Engineering, Nanyang Normal University, Nanyang 473061, Henan, People's Republic of China

Discussion of RG<sup>2</sup>:

The principle of RG<sup>2</sup> can be described as follows: the crystal structure can be represented as an infinitely large graph, with the top set used to record atoms and the edge sets describing chemical bonding relationships; The periodic part can be described as a labeled quotient graph. The steps for calculating RG<sup>2</sup> are as follows: the first step is to generate an initial quotient graph, sort all atomic pairs by distance, and form bonds (establish a quotient graph based on the principle of proximity). The second step is to optimize the atomic coordinates and lattice based on the error between the bond length, bond angle determined by the quotient diagram and the reference value. Step three, filter based on the set geometric features. Step 4: Conduct structural optimization, stability assessment, and property research.

Discussion of HSE hybrid function:

Hybrid functionals which include a portion of Hartree-Fock exchange have been successfully applied in the calculation of thermochemical properties of molecules, in addition to yielding good structural properties. The Heyd-Scuseria-Ernzerhof (HSE) hybrid functional originated as an alternative approach that can be efficiently applied to solids. HSE employs screened short-range Hartree-Fock exchange instead of the full exact exchange, drastically reducing the computational requirements and, at the same time, overcoming the known problems of Hartree-Fock exchange. The expression for the HSE exchange-correlation energy is:

$$E_{xc}^{Hse} = aE_x^{HF,SR} + (1-a)aE_x^{PBE,SR} + E_x^{PBE,LR} + E_c^{PBE} \quad (1)$$

where  $E_x^{HF,SR}$  is the short-range Hartree-Fock exchange,  $E_x^{PBE,SR}$  and  $E_x^{PBE,LR}$  are the short-range and long-range components of the Perdew-Burke-Ernzerhof (PBE) exchange functional, respectively, and  $a=1/4$  is the Hartree-Fock exchange mixing parameter determined via perturbation theory. In HSE, the short-range and long-range partition in Eq. 1 is carried out splitting the Coulomb operator as:

$$\frac{1}{r} = \frac{erfc(\omega r)}{r}(SR) + \frac{erfc(\omega r)}{r}(LR)$$

where erf and erfc are the error and complementary error functions, respectively, and  $\omega$  is the screening parameter.

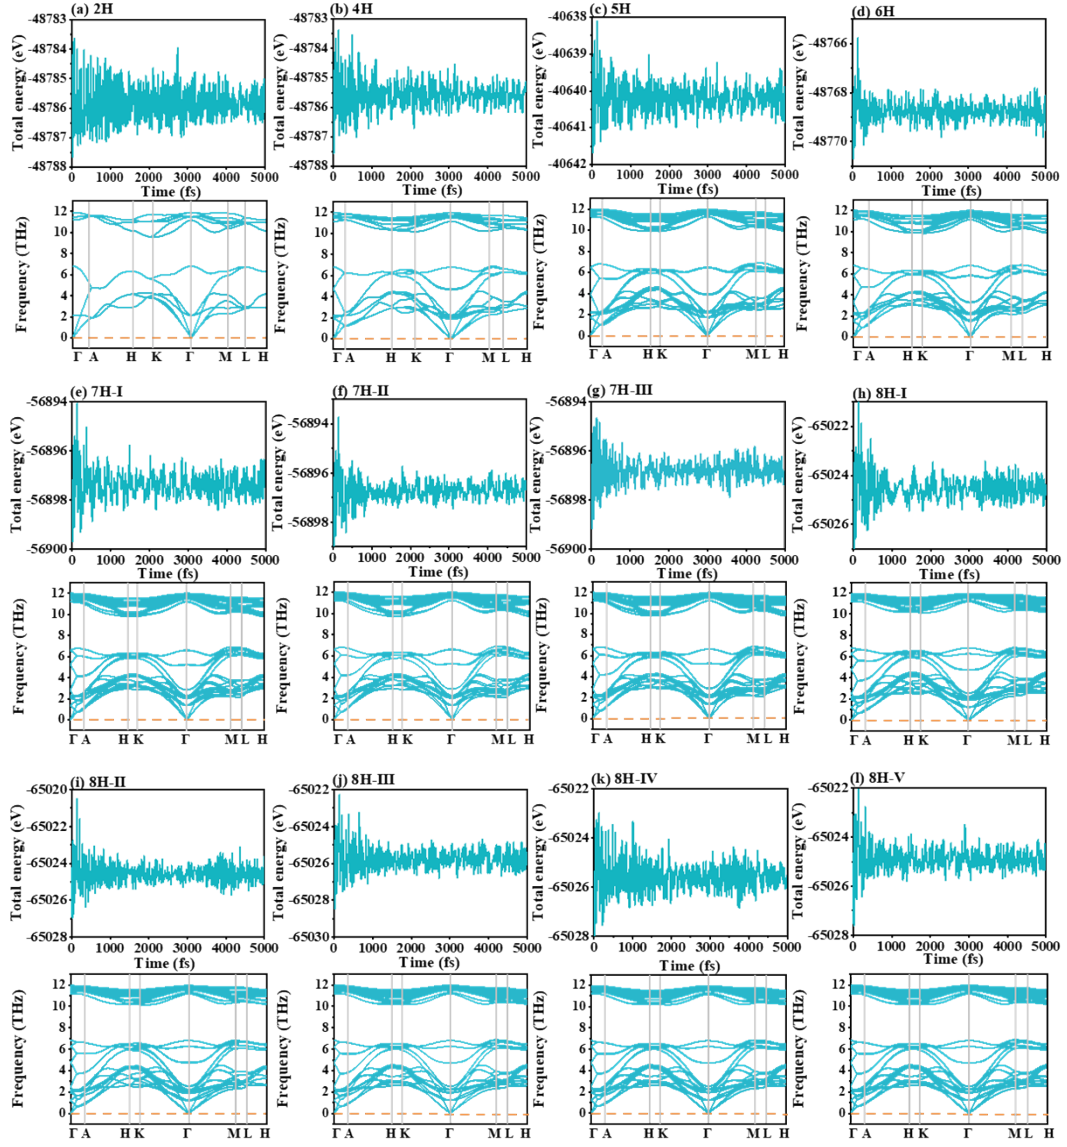

FIG. S1 Total energy fluctuations and phonon spectra of nH SiGe.

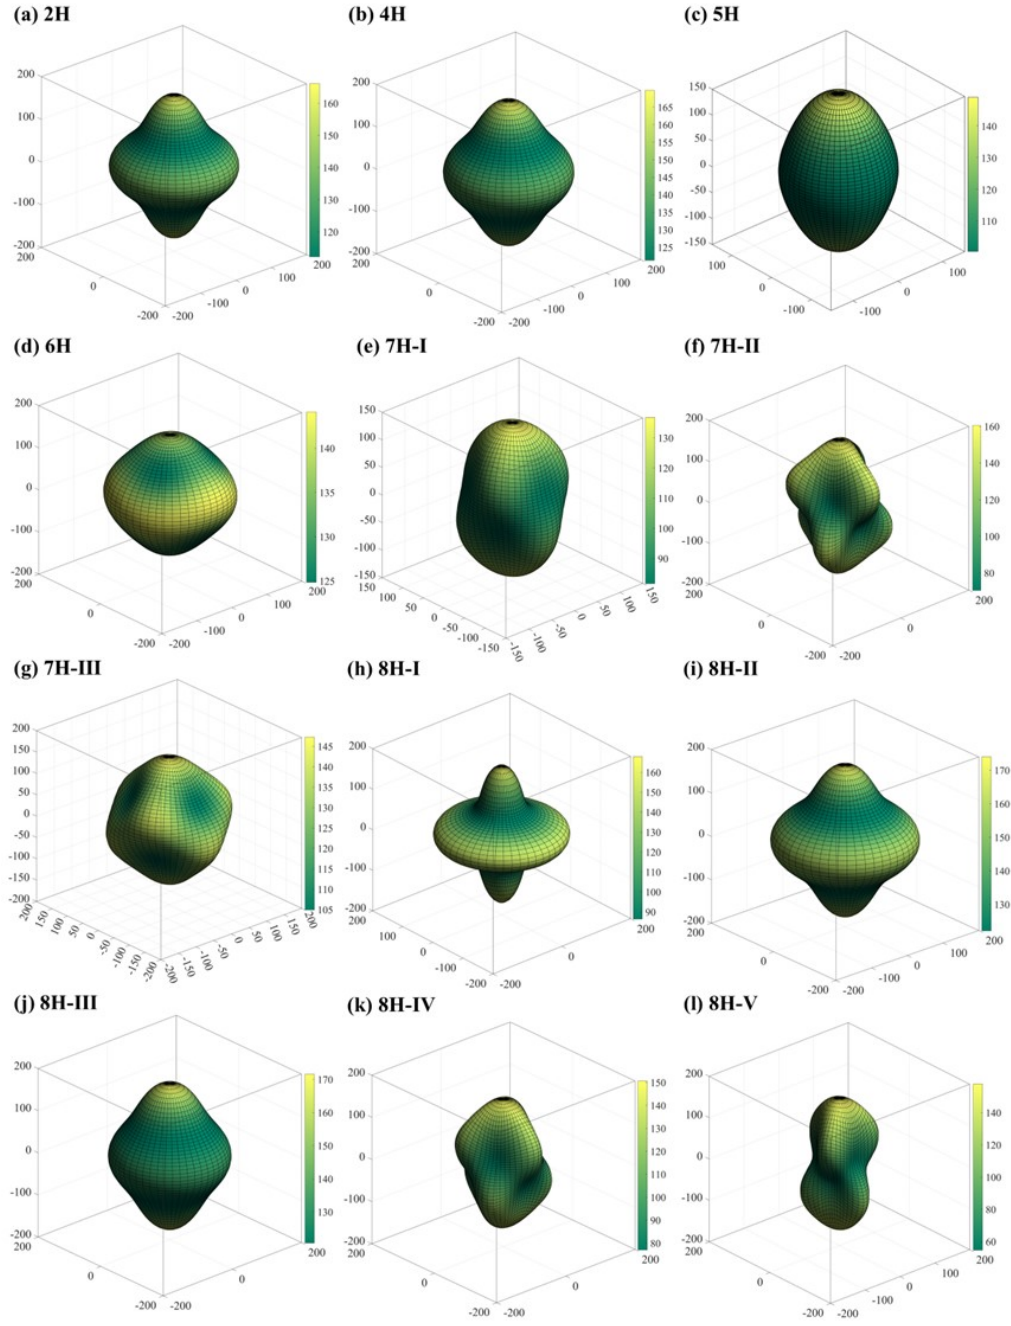

FIG. S2 Directional dependence of the Young's modulus for nH SiGe.

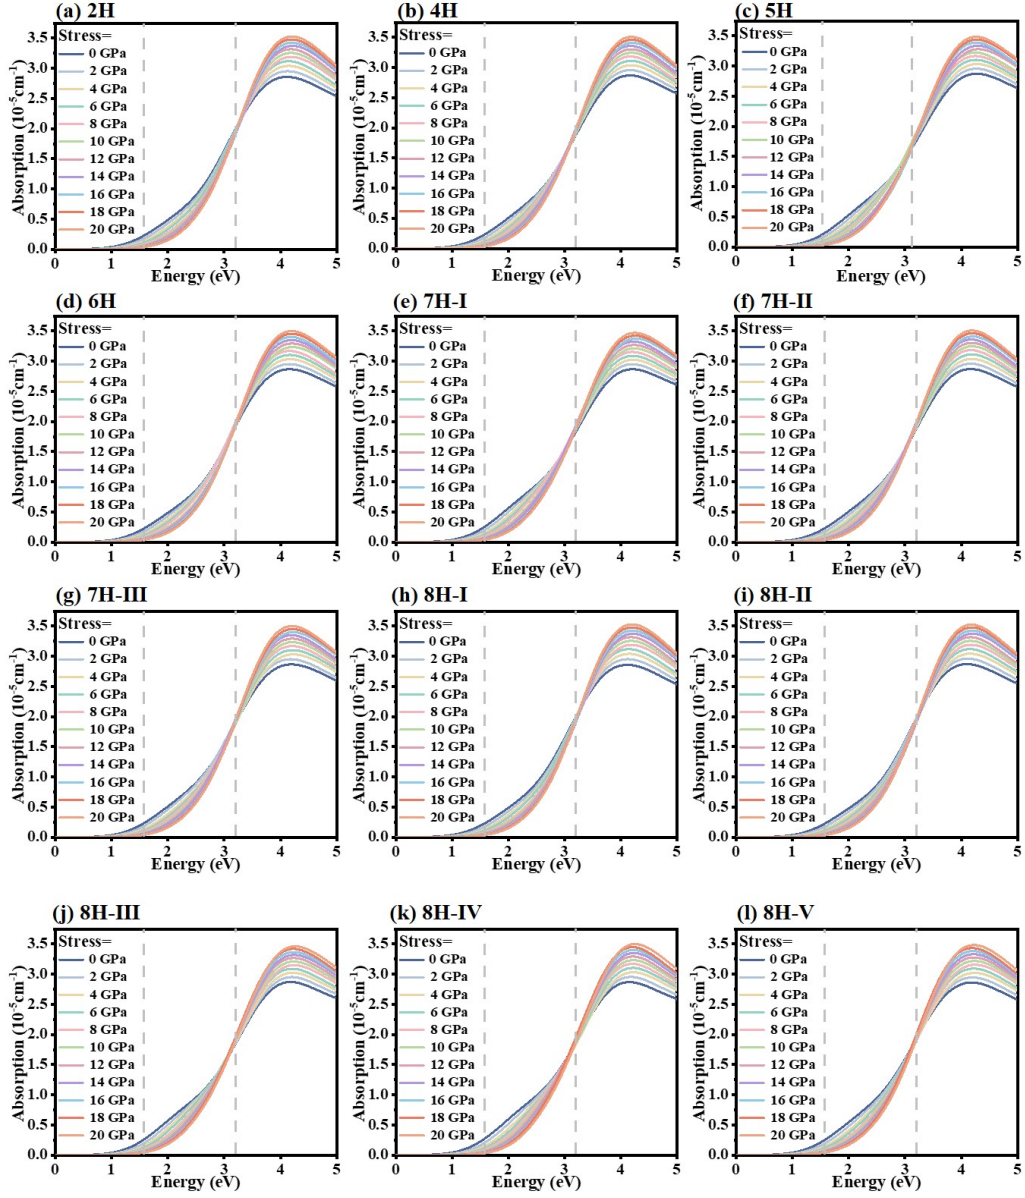

FIG. S3 The relationship between absorption and stress of nH SiGe.

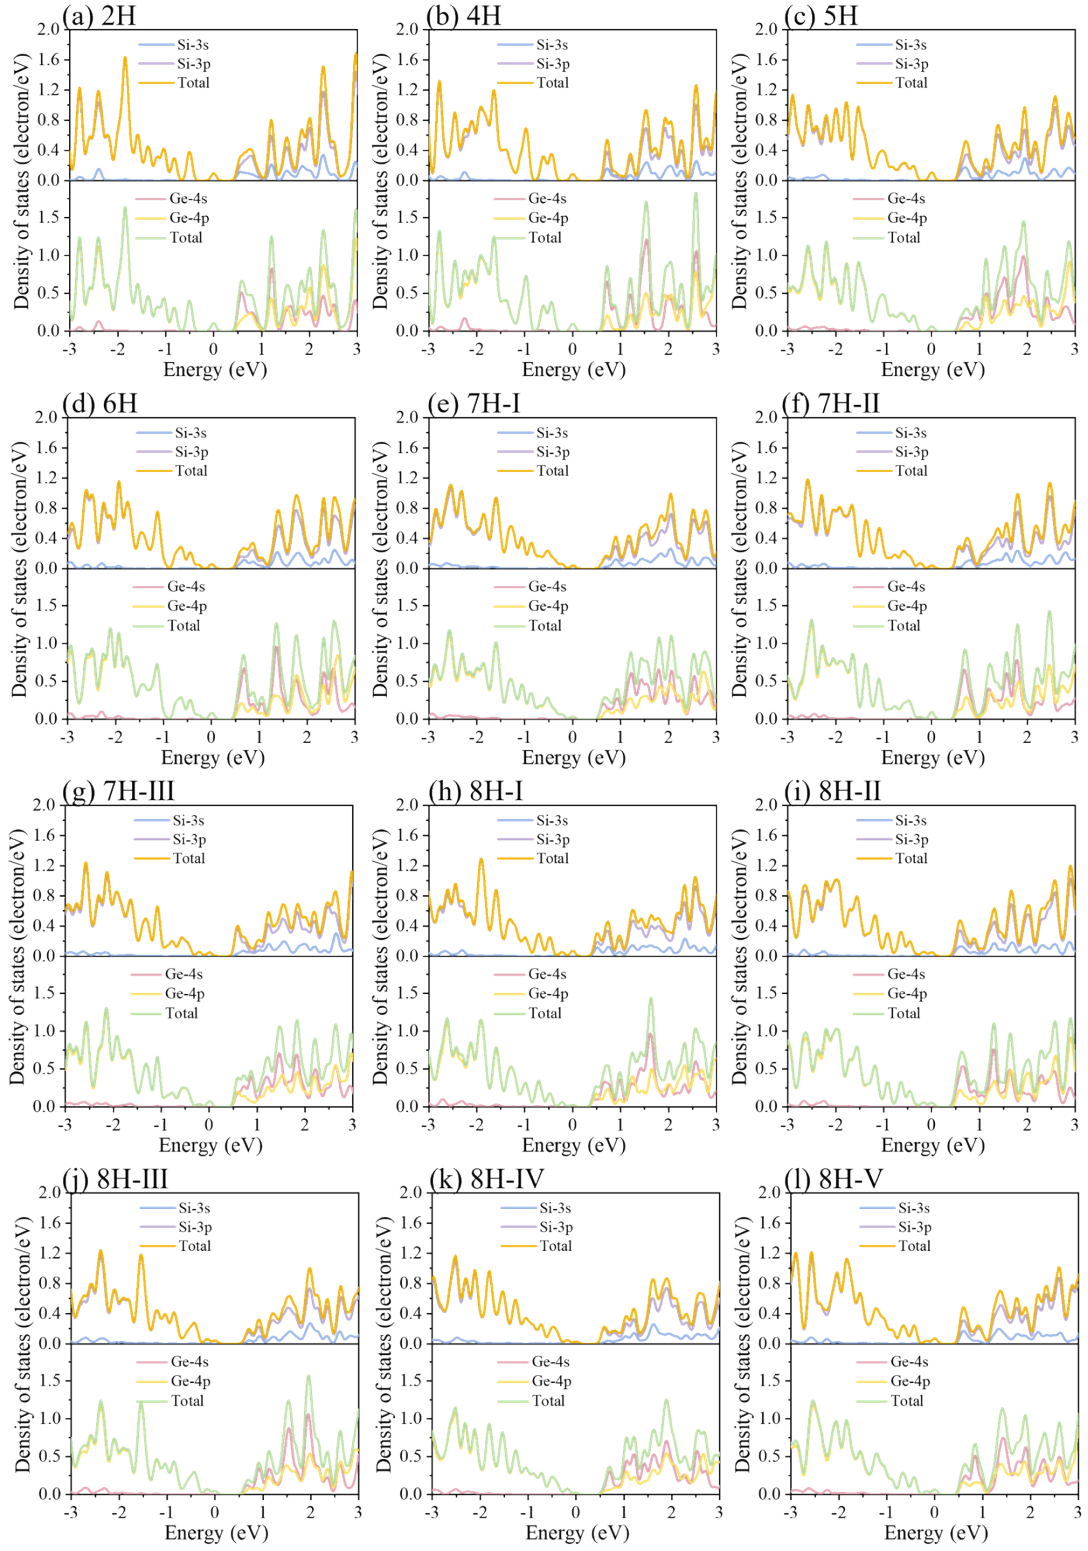

FIG. S4 The PDOS of nH SiGe.

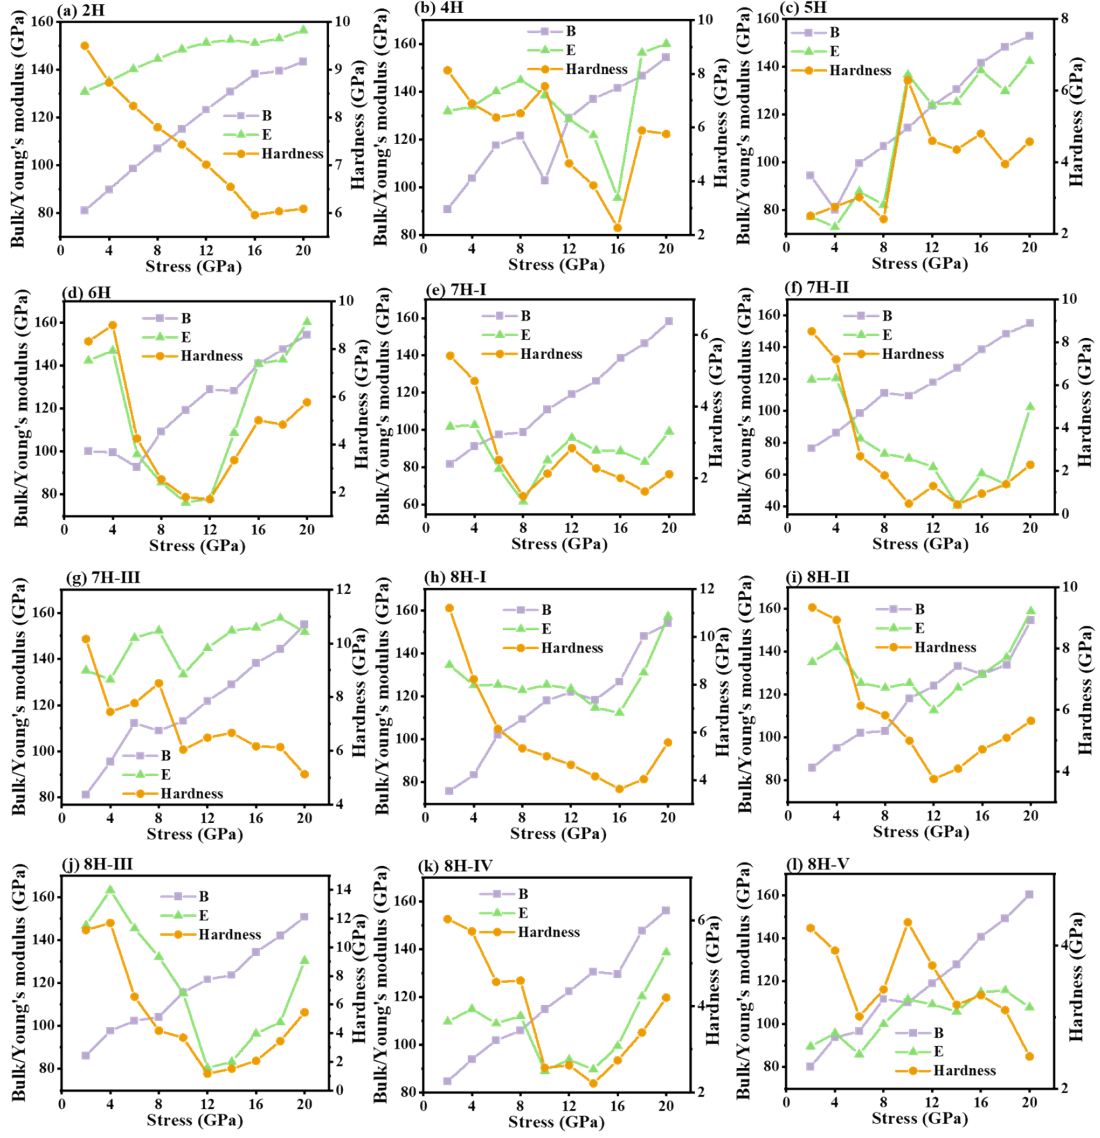

FIG. S5 The relationship between elastic moduli and stress of nH SiGe.

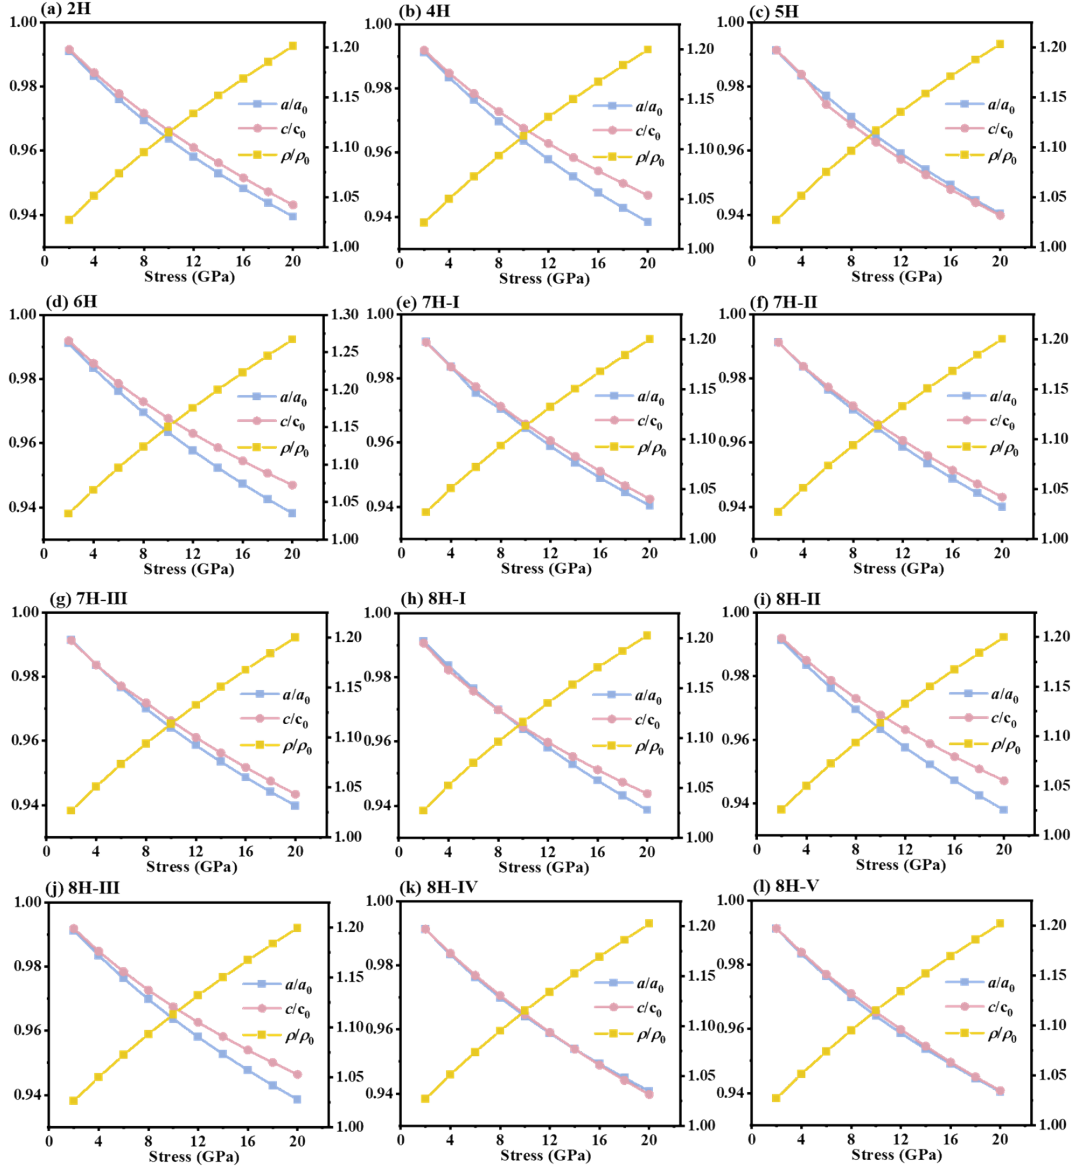

FIG. S6 The parameters as a function of stress of nH SiGe.

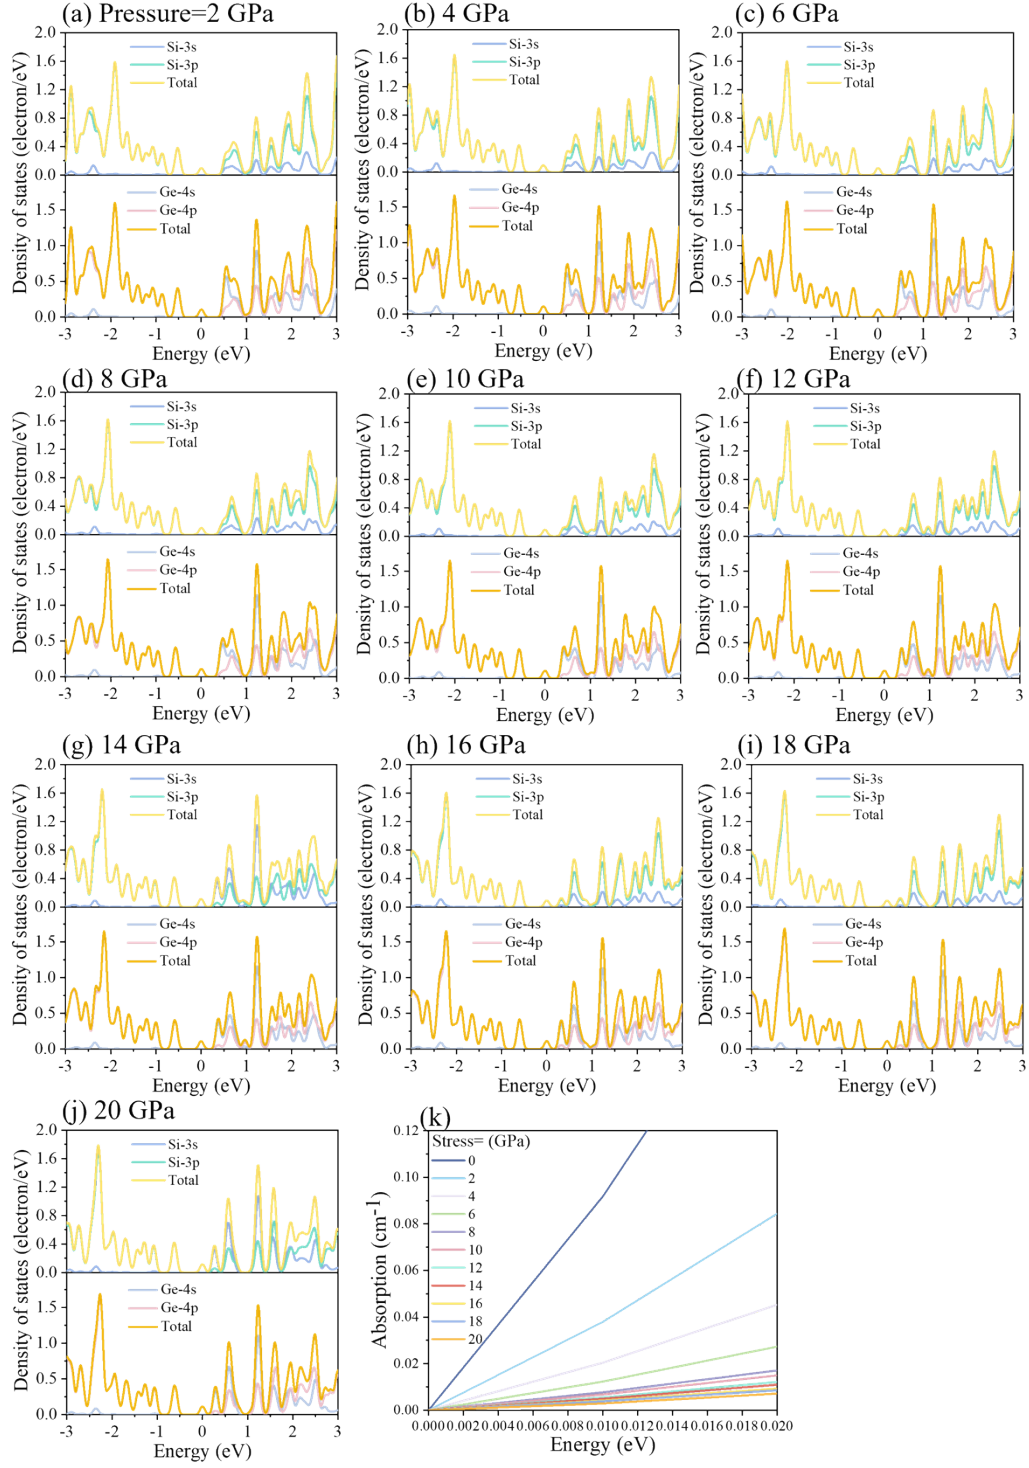

**FIG. S7** The PDOS of 6H SiGe under increasing stress and the detailed absorption of nH SiGe at CBM.

**TABLE S1.** The crystal lattice parameters ( $a$ ,  $c$  in Å), density  $\rho$  (g/cm<sup>3</sup>) and cell volume/atom  $V$  (Å<sup>3</sup>) of nH SiGe.

| Name                    | Space group  | $a$   | $c$    | $\rho$ | $V$    |
|-------------------------|--------------|-------|--------|--------|--------|
| 2H                      | $P6_3mc$     | 3.939 | 6.524  | 3.815  | 21.911 |
| 4H                      | $P6_3mc$     | 3.951 | 12.913 | 3.831  | 21.818 |
| 5H                      | $P3m1$       | 3.948 | 16.246 | 3.812  | 21.927 |
| 6H                      | $P3m1$       | 3.948 | 19.398 | 3.831  | 21.821 |
| 7H-I                    | $P3m1$       | 3.951 | 22.645 | 3.823  | 21.866 |
| 7H-II                   | $P3m1$       | 3.946 | 22.700 | 3.822  | 21.869 |
| 7H-III                  | $P3m1$       | 3.946 | 22.700 | 3.823  | 21.864 |
| 8H-I                    | $P3m1$       | 3.945 | 25.973 | 3.821  | 21.875 |
| 8H-II                   | $P6_3mc$     | 3.947 | 25.880 | 3.830  | 21.822 |
| 8H-III                  | $P6_3mc$     | 3.955 | 25.778 | 3.829  | 21.829 |
| 8H-IV                   | $P3m1$       | 3.950 | 25.968 | 3.811  | 21.935 |
| 8H-V                    | $P3m1$       | 3.946 | 26.002 | 3.814  | 21.915 |
| Diamond Si <sup>b</sup> | $Fd\bar{3}m$ | 5.442 |        | 2.267  |        |

<sup>a</sup> Reference [1].<sup>1</sup>S. Adachi, Springer **1** (2004).**TABLE S2.** The elastic constants (GPa), bulk, shear, Young's moduli (GPa), hardness ( $H$ ) and anisotropy index ( $U$ ) for nH SiGe.

| Name                    | $C_{11}$ | $C_{12}$ | $C_{13}$ | $C_{14}$ | $C_{33}$ | $C_{44}$ | $C_{66}$ | $B$ | $G$ | $E$ | $H$ | $U$   |
|-------------------------|----------|----------|----------|----------|----------|----------|----------|-----|-----|-----|-----|-------|
| 2H                      | 151      | 39       | 24       | 0        | 172      | 42       | 56       | 72  | 53  | 127 | 11  | 0.220 |
| 4H                      | 153      | 40       | 26       | 0        | 177      | 47       | 57       | 74  | 55  | 133 | 12  | 0.141 |
| 5H                      | 140      | 72       | 39       | 0        | 163      | 46       | 34       | 83  | 43  | 111 | 6   | 0.282 |
| 6H                      | 164      | 19       | 60       | 2        | 179      | 46       | 72       | 86  | 56  | 138 | 10  | 0.297 |
| 7H-I                    | 119      | 60       | 32       | -5       | 148      | 45       | 30       | 71  | 40  | 100 | 7   | 0.422 |
| 7H-II                   | 125      | 56       | 21       | 16       | 165      | 52       | 34       | 68  | 44  | 109 | 8   | 1.202 |
| 7H-III                  | 152      | 48       | 39       | -8       | 162      | 47       | 52       | 80  | 51  | 126 | 9   | 0.164 |
| 8H-I                    | 156      | 28       | -13      | -1       | 170      | 31       | 64       | 54  | 52  | 118 | 14  | 1.093 |
| 8H-II                   | 165      | 29       | 24       | 0        | 180      | 45       | 68       | 74  | 59  | 140 | 13  | 0.250 |
| 8H-III                  | 146      | 43       | 15       | 0        | 174      | 49       | 51       | 68  | 55  | 130 | 12  | 0.168 |
| 8H-IV                   | 127      | 63       | 32       | 10       | 161      | 47       | 32       | 74  | 42  | 106 | 7   | 0.697 |
| 8H-V                    | 119      | 79       | 28       | -9       | 166      | 45       | 20       | 75  | 35  | 90  | 5   | 1.903 |
| 4H Si <sup>a</sup>      | 180      | 50       | 36       |          | 197      | 52       |          | 63  | 40  | 99  |     |       |
| Diamond Si <sup>b</sup> | 166      | 64       |          |          |          | 80       |          | 88  | 64  | 155 |     |       |

<sup>a</sup> Reference [1].<sup>b</sup> Reference [2].<sup>1</sup>S. Adachi, Springer **1** (2004).<sup>2</sup>Y. L. Wei, J. X. Li, X. Z. Shi, J. Li and C. Y. He, Scripta Mater. **219**, 114843 (2022)**TABLE S3.** The absorption strength of nH SiGe and their multiple absorption intensity compared to diamond Si in different regions.

| Name       | absorption strength<br>in the whole region | Multiple | absorption strength<br>in the visible region | Multiple |
|------------|--------------------------------------------|----------|----------------------------------------------|----------|
| 2H         | 621471.65                                  | 3.09     | 120282.59                                    | 14.15    |
| 4H         | 621792.55                                  | 3.09     | 124579.69                                    | 14.65    |
| 5H         | 616851.51                                  | 3.07     | 124993.53                                    | 14.70    |
| 6H         | 621251.20                                  | 3.09     | 127525.76                                    | 15.00    |
| 7H-I       | 619926.73                                  | 3.08     | 127172.40                                    | 15.00    |
| 7H-II      | 617616.92                                  | 3.07     | 122022.44                                    | 14.35    |
| 7H-III     | 620217.38                                  | 3.08     | 123187.99                                    | 14.49    |
| 8H-I       | 624660.98                                  | 3.10     | 124087.82                                    | 14.60    |
| 8H-II      | 621480.66                                  | 3.09     | 120481.49                                    | 14.17    |
| 8H-III     | 622943.13                                  | 3.10     | 128502.16                                    | 15.11    |
| 8H-IV      | 628205.84                                  | 3.12     | 131932.58                                    | 15.52    |
| 8H-V       | 626667.62                                  | 3.12     | 128651.01                                    | 15.13    |
| Diamond Si | 201028.92                                  | 1        | 8501.79                                      | 1        |
